# 1 Partial reprogramming induces a steady decline in epigenetic 2 age before loss of somatic identity

3 Nelly Olova<sup>1†</sup>, Daniel J Simpson<sup>1†</sup>, Riccardo Marioni<sup>2</sup>, Tamir Chandra<sup>1\*</sup>

4 <sup>1</sup>MRC Human Genetics Unit, MRC Institute of Genetics and Molecular Medicine,  
5 University of Edinburgh, Edinburgh, United Kingdom; <sup>2</sup>Centre for Cognitive Ageing and Cognitive  
6 Epidemiology, and Centre for Genomic and Experimental Medicine, University of Edinburgh,  
7 Edinburgh, United Kingdom; <sup>†</sup>These authors contributed equally to this work

8

9 \* to whom correspondence should be addressed:

10 Dr Tamir Chandra

11 MRC Human Genetics Unit

12 Institute of Genetics & Molecular Medicine

13 University of Edinburgh EH4 2XU

14 E-mail: [tamir.chandra@igmm.ed.ac.uk](mailto:tamir.chandra@igmm.ed.ac.uk)

15 Tel.: +44 (0) 131 651 8619

16

17 Non-corresponding e-mails: [nelly.olova@igmm.ed.ac.uk](mailto:nelly.olova@igmm.ed.ac.uk); [s1684303@sms.ed.ac.uk](mailto:s1684303@sms.ed.ac.uk);

18 [riccardo.marioni@ed.ac.uk](mailto:riccardo.marioni@ed.ac.uk)

19

## 20 Keywords

21 Rejuvenation, epigenetic age, ageing clock, partial reprogramming, iPSC, ageing

22

## 23 Summary

24 Induced pluripotent stem cells (iPSCs), with their unlimited regenerative capacity,  
25 carry the promise for tissue replacement to counter age-related decline. However,  
26 attempts to realise *in vivo* iPSC have invariably resulted in the formation of  
27 teratomas. Partial reprogramming in prematurely aged mice has shown promising  
28 results in alleviating age-related symptoms without teratoma formation. Does partial  
29 reprogramming lead to rejuvenation (i.e. “younger” cells), rather than  
30 dedifferentiation, which bears the risk of cancer? Here we analyse the dynamics of  
31 cellular age during human iPSC reprogramming and find that partial reprogramming  
32 leads to a reduction in the epigenetic age of cells. We also find that the loss of  
33 somatic gene expression and epigenetic age follow different kinetics, suggesting that  
34 they can be uncoupled and there could be a safe window where rejuvenation can be  
35 achieved with a minimised risk of cancer.

36

## 37 Introduction, Results, Discussion

38 The human ageing process is accompanied by multiple degenerative diseases. Our  
39 understanding of such ageing related disorders is, nevertheless, fragmented, and the  
40 existence and nature of a general underlying cause are still much debated (Faragher  
41 2015; Gladyshev & Gladyshev 2016). The generation of induced pluripotent stem  
42 cells (iPSCs) allows the reprogramming of somatic cells back to an embryonic stem  
43 cell (ESC) like state with an unlimited regenerative capacity. This has led to multiple  
44 strategies for tissue replacement in degenerative diseases (Takahashi et al. 2007).  
45 Clinical application of iPSCs however, is at its infancy (V. K. Singh et al., 2015;  
46 Soria-Valles et al., 2015; Takahashi & Yamanaka, 2016), and the potency of iPSCs  
47 bears risks, not least cancer induction. For example, *in vivo* experiments with iPSCs  
48 have shown that continuous expression of Yamanaka factors (Oct4, Sox2, Klf4 and  
49 c-Myc, thus OSKM) in adult mice invariably leads to cancer (Abad et al. 2013;  
50 Ohnishi et al. 2014).

51 To avoid this risk, a parallel concept of epigenetic rejuvenation has been proposed:  
52 the ageing process in cells can be reversed whilst avoiding dedifferentiation (Singh &  
53 Zacouto 2010; Manukyan & Singh 2012). In other words, an old dysfunctional heart  
54 cell could be rejuvenated without the need for it to be passed through an  
55 embryonic/iPSC state. The concept of epigenetic rejuvenation requires that  
56 rejuvenation and dedifferentiation each follow a distinct pathway. Nevertheless, it is  
57 not well understood whether rejuvenation and dedifferentiation are invariably  
58 intertwined, or instead whether it is possible to manipulate age without risking  
59 dedifferentiation.

60 The epigenetic rejuvenation potential of partial reprogramming with OSKM factors  
61 was previously shown by the forced expression of OSKM+*LIN28* in senescent  
62 human fibroblasts, which led to recovering the high mobility of histone protein 1 $\beta$  by  
63 day 9, a feature characteristic for young fibroblasts (Manukyan & Singh 2014).  
64 Ocampo et al. further demonstrated that partial reprogramming by transient cyclic  
65 induction of OSKM ameliorates signs of ageing and extends lifespan in progeroid  
66 mice, with no resulting teratoma formation (Ocampo et al. 2016). This established  
67 partial reprogramming as a promising candidate intervention for age-related disease.  
68 Estimating epigenetic age, which is currently the most promising proxy for biological

69 age (Jylhävä et al. 2017; Wagner 2017), was, however, not possible to measure in  
70 mice at the time of the Ocampo study. This has left the nature (i.e.

71 dedifferentiation/rejuvenation) of the described cellular changes unexplored:

72 1) Does the epigenetic remodelling seen truly reflect rejuvenation (i.e. a reduction  
73 in cellular/tissue age)? If so, can we observe a decrease in epigenetic age in  
74 partially reprogrammed human cells?

75 2) What is the extent of rejuvenation upon reaching a partially reprogrammed  
76 state (e.g. years of epigenetic age decrease)?

77 3) What are the dynamics of dedifferentiation in early reprogramming?  
78

79 A major obstacle in understanding the relation between differentiation and ageing  
80 has been our inability to accurately measure cellular age with a high correlation to  
81 the chronological age of the organism. However, over the last five years a number of  
82 age predictors have been developed, the most accurate of which utilise DNA  
83 methylation (known as epigenetic clocks) (Horvath 2013; Hannum et al. 2013;  
84 Weidner et al. 2014; Levine et al. 2018; Horvath et al. 2018), with the first Horvath  
85 multi-tissue age-predictor being the most widely applicable and used ( $r=0.96$ ). This  
86 “Horvath clock” shows the highest correlation to chronological age, predicting the  
87 age (or epigenetic age, eAge) of multiple tissues with a median error of 3.6 years  
88 (Horvath 2013). eAge is distinct from and poorly correlated with other age-related  
89 biomarkers, such as senescence and telomere length, which have been shown to  
90 correlate independently with the process of ageing (Lowe et al. 2016; Marioni et al.  
91 2016). Moreover, an acceleration of epigenetic age as measured by the “Horvath  
92 clock” is associated with a higher risk of all-cause mortality (Marioni et al. 2015;  
93 Christiansen et al. 2016; Perna et al. 2016), premature ageing syndromes (Down  
94 and Werner) (Maierhofer et al. 2017; Horvath et al. 2015), frailty and menopause  
95 (Breitling et al. 2016; Levine et al. 2016). All of these studies suggest that eAge may  
96 capture a degree of biological ageing.

97

98 To understand the dynamics of eAge during reprogramming, we applied Horvath’s  
99 multi-tissue age predictor over a previously published reprogramming time-course on  
100 human dermal fibroblasts (HDFs) (Ohnuki et al. 2014; Horvath 2013). After OSKM  
101 transfection, successfully transformed subpopulations were isolated and analysed at  
102 regular time points during 49-days for gene expression and DNA methylation

103 (detailed schematic shown in Supplementary Figure 1). Epigenetic rejuvenation, i.e.  
104 decrease of eAge, commenced between days 3 and 7 after OSKM transduction in  
105 the partially reprogrammed TRA-1-60 (+) cells (characterised in Tanabe et al. 2013)  
106 and continued steadily until day 20, when eAge was stably reset to zero (Fig. 1a). A  
107 broken stick model (comprising two linear regressions joined at a break-point),  
108 showed a good fit to the observed data starting from day 3, and measured a steady  
109 decrease with 3.8 years per day until day 20 (SE 0.27,  $P = 3.8 \times 10^{-7}$ ) (Fig. 1a). The  
110 TRA-1-60 (+) cell populations at days 7 and 11 have been previously characterised  
111 as 'partially reprogrammed' for their high expression of pluripotency markers but also  
112 high reversion rates towards somatic state (Tanabe et al. 2013). Therefore, the  
113 observed eAge decline at days 7 and 11 suggests that partial reprogramming can  
114 indeed be considered a rejuvenation mechanism in human cells.

115 Horvath's multi-tissue age predictor is the most accurate and widely used for various  
116 cell types and tissues (Wagner 2017). Nevertheless, we calculated eAge from  
117 alternative DNA methylation-based age predictors: four tissue-specific clocks  
118 (Hannum et al. 2013; Weidner et al. 2014; Horvath et al. 2018), one that incorporates  
119 clinical measures, called PhenoAge (Levine et al. 2018), and individual CpGs  
120 previously correlated with age (Garagnani et al. 2012). All clocks consistently  
121 reached the point of reset to their iPSC eAge at day 20, despite the cells not being  
122 fully reprogrammed before day 28 (Ohnuki et al. 2014) (Supplementary Figure 2).  
123 Again, eAge showed a steady decline from day 3 to day 20 in the skin & blood and  
124 Weidner 99 CpG clocks, PhenoAge declined from day 7 to day 20, while the  
125 Hannum and Weidner 3 CpG clocks did not produce informative trajectories. Overall,  
126 eAge values and 'years' of decrease varied between the clocks (actual chronological  
127 age of HDF donors is not available for reference) (Supplementary Figure 2). The  
128 highest age associated individual CpG (*ELOVL2*'s cg16867657) showed a similar  
129 trajectory to the Horvath eAge decline, however, the remaining CpGs produced  
130 inconsistent trajectories (Supplementary Figure 2). The observed differences are not  
131 surprising, given the alternative clocks were validated for blood (Hannum et al. 2013;  
132 Weidner et al. 2014), forensic applications (Horvath et al. 2018), whole organisms  
133 (Levine et al. 2018) or various tissues as for the individual CpGs (Garagnani et al.  
134 2012).

135 In Ocampo et al. partial reprogramming was achieved after just two days of OSKM  
136 induction in mice carrying an inducible OSKM transgene (Ocampo et al. 2016).

137 However, such 'secondary' systems for direct reprogramming are known to have up  
138 to 50-fold higher efficiency and accelerated kinetics in comparison to virally  
139 transduced *in vitro* systems (Wernig et al. 2008). To facilitate comparison to other  
140 systems and associate eAge with intermediate states in the reprogramming  
141 trajectory we compared it to gene expression measured in the same samples. We  
142 analysed corresponding microarray expression data for 19 well-established  
143 pluripotency marker genes (Table 1 and Supplementary fig.3) as a proxy for  
144 reaching a mature pluripotent state (Ginis et al. 2004; Cai et al. 2006; Mallon et al.  
145 2013; Galan et al. 2013; Boyer et al. 2005). We statistically clustered the expression  
146 patterns of those genes (Genolini et al. 2015), which resulted in two composite  
147 trajectories. These followed previously described expression dynamics of early  
148 (cluster 1) and late (cluster 2) activated pluripotency genes (Fig. 1a) (Tanabe et al.  
149 2013; Chung et al. 2014; Buganim et al. 2012; Takahashi & Yamanaka 2016).  
150 Pluripotency gene cluster 1 included *NANOG*, *SALL4*, *ZFP42*, *TRA-1-60*, *UTF1*,  
151 *DPPA4* and *LEFTY2*, and their expression increased dramatically within the first 10  
152 days and then established stable pluripotency expression levels by day 20. In  
153 contrast, pluripotency gene cluster 2 (containing late expressing genes such as  
154 *LIN28*, *ZIC3* and *DNMT3B*) elevated expression more slowly and reached stable  
155 pluripotency levels by day 28 (Tanabe et al. 2013; Chung et al. 2014). Interestingly,  
156 eAge reset to zero at the same time that the genes in cluster 1 reached their  
157 pluripotent state levels, which temporally precedes full pluripotency. This also  
158 coincided with a peak in expression of a number of embryonic developmental genes  
159 between days 15 and 20, and might suggest that the reset marks a point where the  
160 cells reach an embryonic-like state but are not yet fully pluripotent (Table 1 and  
161 Supplementary Figure 4). In summary, eAge decline is observed well within the first  
162 wave of pluripotency gene expression.

163

164 Therapeutic partial reprogramming will depend on rejuvenation with minimal  
165 dedifferentiation, which carries the risk of malignancies. We studied the dynamics of  
166 fibroblast gene down-regulation as a proxy for the loss of somatic cell identity. The  
167 individual trajectories of 19 commonly used fibroblast marker genes (Kalluri &  
168 Zeisberg 2006; Zhou et al. 2016; Janmaat et al. 2015; Pilling et al. 2009; Chang et  
169 al. 2014; Goodpaster et al. 2008; MacFadyen et al. 2005) (Table 1 and  
170 Supplementary Fig. 5) clustered into three composite expression patterns, two of

171 which (clusters 2 and 3) went into an immediate decline after OSKM induction (Fig.  
172 1b). However, one fibroblast-specific cluster (cluster 1) remained stable in its  
173 expression for the first 15 days. Interestingly, after day 7, fibroblast-specific gene  
174 expression in clusters 2 and 3 stopped declining and plateaued until day 15,  
175 coinciding with a peak in expression of senescence markers between days 11 and  
176 15 (Supplementary Figure 6). Vimentin (*VIM*), for example, remained at 60% of  
177 maximal expression until day 15 of reprogramming, similarly to *FAP*, *CD248* and  
178 *COL1A2* in cluster 2 (Supplementary fig. 5). After day 15, fibroblast gene expression  
179 declined rapidly in all three clusters, and only by day 35 had all reached ESC  
180 expression levels, marking a complete loss of somatic identity (Fig. 1b). Cluster 1,  
181 which contains the well described indicators of fibroblast identity *FSP1*, *COL3A1* and  
182 *TGFB2/3* (Kalluri & Zeisberg 2006), showed the slowest decline, and was also the  
183 last to reach ESC expression levels. In summary, we found that a number of  
184 fibroblast specific genes maintained high expression levels until day 15, by which  
185 time a substantial drop in eAge has been observed.

186

187 Epigenetic rejuvenation or the reversal of cellular age, is a promising concept as it  
188 could avoid the oncogenic risks associated with dedifferentiation. Here, we analysed  
189 a reprogramming time-course on HDFs and show that eAge declines in partially  
190 reprogrammed cells before their somatic identity is entirely lost.

191 It is well established that partial reprogramming happens within an early, reversible  
192 phase during the iPSC reprogramming time-course, which involves the stochastic  
193 activation of pluripotency genes. It is followed by a more deterministic maturation  
194 phase with predictable order of gene expression changes, where cell fate is firmly  
195 bound towards pluripotency (Takahashi & Yamanaka 2016; Smith et al. 2016).  
196 Indeed, it has been shown that mouse fibroblasts fail to become iPSC and revert to  
197 their original somatic state if OSKM expression is discontinued during the initial  
198 stochastic phase (Brambrink et al. 2008; Stadtfeld et al. 2008). Previously, Tanabe et  
199 al. showed that TRA-1-60 (+) cells at reprogramming days 7 and 11 have not yet  
200 reached maturation and are partially reprogrammed (Tanabe et al. 2013) but our  
201 analysis already shows a decrease in their eAge according to multiple age predictors  
202 (Fig. 1a and Supplementary Figure 2). We have also shown that a large proportion of  
203 fibroblast marker genes maintain relatively high levels of expression until day 15  
204 (Fig. 1b and Supplementary Figure 5). Nearly unchanged levels of expression on



205 day 15 were previously also shown for a large proportion of somatic genes (Tanabe  
206 et al. 2013). Together with increased senescence gene expression between days 11  
207 and 15 (Supplementary Figure 6), this likely contributes to the high propensity of  
208 partially reprogrammed TRA-1-60 (+) cells to revert back to somatic phenotype  
209 before day 15 in the time-course (Tanabe et al. 2013). Interestingly, the step-wise  
210 decline of fibroblast gene expression coinciding with a peak in expression of  
211 senescence genes seems to delay the loss of somatic identity but not the expression  
212 of pluripotency genes. Taken together, the different dynamics between the step-wise  
213 fibroblast expression and the linear decline in eAge further indicate that  
214 dedifferentiation and epigenetic rejuvenation can be uncoupled.

215 Our data suggest a window of opportunity within the uncommitted reprogramming  
216 phase, where a decline of eAge happens alongside partial maintenance of fibroblast  
217 gene expression. A deeper understanding of the kinetics of rejuvenation will be  
218 required to master therapeutic partial reprogramming, since any progress of  
219 dedifferentiation, even in a small subpopulation, carries the risk of malignancies. Our  
220 bulk expression analysis does not allow for a precise definition of the safe  
221 rejuvenation boundaries, and further experiments on a single cell level and in *in vivo*  
222 conditions are needed to determine a safe epigenetic rejuvenation window in  
223 different reprogramming systems. Upon defining safe boundaries, consideration  
224 should also be given to the steep decline of eAge, which resets to zero well ahead of  
225 the establishment of a pluripotent state, according to a number of age predictors  
226 (Supplementary Figure 2). Most likely this marks the point of reaching prenatal or  
227 embryonic stage, as suggested by the peak in expression of key developmental  
228 genes (Supplementary Figure 4).

229 The extent of epigenetic rejuvenation in years (human) or months (mouse), which  
230 can be achieved through partial reprogramming, also needs further attention and will  
231 most likely differ with the different reprogramming systems. The ‘Horvath clock’  
232 shows up to 10 years of rejuvenation in Ohnuki et al.’s system by day 7 and another  
233 10+ years by day 11. However, the intrinsic median estimation error of 3.6 years in  
234 this age predictor, the varying eAge rejuvenation values between the different age  
235 predictors, and the intra-replicate biological variation seen from the large error bars,  
236 highlight the need for more experiments and repetitions before this is established  
237 with a higher certainty.

238 Despite the obvious differences in reprogramming kinetics, our results also suggest  
239 that the improvements observed by Ocampo et al. in their OSKM-inducible  
240 secondary reprogramming system, might be due to epigenetic rejuvenation. It  
241 remains to be shown how stable in time the rejuvenated phenotype is in either of the  
242 systems. Further analysis is also needed regarding the effect of partial  
243 reprogramming on adult stem cells or premalignant cells, which have already shown  
244 a higher propensity of transforming to malignancy (Abad et al. 2013; Ohnishi et al.  
245 2014). It is possible that a premalignant phenotype could be attenuated or amplified  
246 by partial reprogramming. In summary, our findings reveal exciting possibilities but  
247 also open a number of questions and highlight areas that need further attention.

248

### 249 Acknowledgements

250 We thank Chris Ponting, Steve Horvath and Keisuke Kaji for their helpful advice and  
251 comments on the manuscript.

252

### 253 Conflict of interest

254 The authors of this paper have no conflicts of interest to declare.

255

### 256 Supplemental Experimental procedures

#### 257 *Overview of the Ohnuki et al. experimental setup and datasets*

258 450K DNA methylation array and gene expression microarray data of full HDF  
259 reprogramming time-course was obtained from GSE54848. A schematic of  
260 experimental setup and time points is provided in Supplementary Figure 1. Briefly,  
261 HDF cells were transfected with EGFP-labelled OSKM on day 0 and cultured in  
262 virus-containing medium for 24 hours, then replaced by 10% FBS-containing  
263 medium for 8 days before replacing with human ESC medium. EGFP (+) cells,  
264 representing the population of successfully transfected cells, which permanently  
265 express the OSKM factors, were sorted by flow cytometry on day 3. Intermediate  
266 reprogrammed cells positive for the pluripotency marker TRA-1-60 were sorted by  
267 magnetic activated cell sorting on days 7, 11, 15, 20 and 28 post-transfection. Day  
268 28-sorted TRA-1-60 (+) cells were further expanded and samples collected three  
269 more times on each seventh day, i.e. on days 35, 42 and 49. Thus, sorted and  
270 collected cells at each time point were subjected to both gene expression and DNA



271 methylation array analysis. Microarray gene expression (data available as LOG2  
272 transformed) was performed for three to four replicates per data point, whilst DNA  
273 methylation data was performed for two to three replicates per time point.

274

### 275 *Predicting eAge*

276 The pre-processed 450K DNA methylation array matrix of average methylation per  
277 CpG site of the full HDF reprogramming time-course was obtained from GSE54848  
278 (downloaded using getGEO function from GEOquery package) and uploaded to the  
279 online DNA methylation age calculator to assess eAge:  
280 <https://labs.genetics.ucla.edu/horvath/dnamage/> (Horvath 2013). Data processing  
281 including Horvath's normalisation was performed according to tutorial guidelines.  
282 Missing CpG values were imputed by Horvath's online DNAm age calculator. During  
283 QC, around 1600 CpGs were lost, therefore methylation data for each time point  
284 contained 26,987 CpG sites out of the suggested 28,587 CpGs, a fact unlikely to  
285 have any significant impact on the normalisation or age prediction. PhenoAge, skin &  
286 blood, Hannum, Weidner 99 and 3 CpG age predictors were applied to average  
287 methylation values. Missing CpG values were imputed as zero before applying these  
288 age predictors.  
289 All ages presented in the manuscript are calculated eAges, no actual ages of HDF  
290 donors were available.

291

### 292 *Methylation Age Trajectories*

293 For the Horvath multi-tissue age predictor, a 'broken stick' model with two linear  
294 sections was constructed to chart overall change in DNA methylation age over time  
295 between the three HDF cell lines. A linear mixed model was then specified with a  
296 random intercept term for each replicate. A variable break point was set between the  
297 minimum and maximum day, plus and minus a small constant (3 days), respectively.  
298 The predicted values from the regression models were plotted against the  
299 measurement day. For the all other age predictor plots (Supplementary Figure 2),  
300 mean eAge was calculated for all samples at each time point (2-3 samples  
301 depending on the time point) and plotted against time during the time-course.  
302 Standard deviation for eAge was also calculated and plotted as error bars at each  
303 time point.

304

### 305 *Gene clusters and trajectories*

306 For each gene in a category (e.g. pluripotent gene list), a loess curve with a span of  
307 0.5 was fitted with the predicted values extracted at each time point. The predicted  
308 values were then normalised within each gene to a value of 1 at the first time point  
309 and a value of 0 and the last time point (and vice versa for the pluripotent genes). K-  
310 means clustering for longitudinal data was applied to determine the optimal number  
311 of trajectories within each gene category.

312 All analyses were performed in R, using the kml (Genolini et al. 2015), lme4 (Bates  
313 et al. 2014), and lmerTest (Kuznetsova et al. 2016) packages.

### 314 References

315

- 316 Abad M, Mosteiro L, Pantoja C, Cañamero M, Rayon T, Ors I, Graña O, Megías D,  
317 Domínguez O, Martínez D, Manzanares M, Ortega S & Serrano M (2013)  
318 Reprogramming in vivo produces teratomas and iPS cells with totipotency  
319 features. *Nature* 502, 340–345.
- 320 Bates D, Mächler M, Bolker B & Walker S (2014) Fitting Linear Mixed-Effects Models  
321 using lme4. 67.
- 322 Boyer L a L a., Lee TITI, Cole MFMF, Johnstone SESE, Stuart S, Zucker JPJP,  
323 Guenther MGMG, Kumar RMRM, Murray HLHL, Jenner RGRG, Gifford DK,  
324 Melton D a, Jaenisch R, Young R a, Levine SS & Others (2005) Core  
325 Transcriptional Regulatory Circuitry in Human Embryonic Stem Cells. *Young*  
326 122, 947–956.
- 327 Brambrink T, Foreman R, Welstead GG, Lengner CJ, Wernig M, Suh H & Jaenisch  
328 R (2008) Sequential Expression of Pluripotency Markers during Direct  
329 Reprogramming of Mouse Somatic Cells. *Cell Stem Cell* 2, 151–159.
- 330 Breitling LP, Saum K-U, Perna L, Schöttker B, Holleczeck B & Brenner H (2016)  
331 Frailty is associated with the epigenetic clock but not with telomere length in a  
332 German cohort. *Clin. Epigenetics* 8, 21.
- 333 Buganim Y, Faddah DA, Cheng AW, Itskovich E, Markoulaki S, Ganz K, Klemm SL,  
334 Van Oudenaarden A & Jaenisch R (2012) Single-cell expression analyses  
335 during cellular reprogramming reveal an early stochastic and a late hierarchic  
336 phase. *Cell* 150, 1209–1222.
- 337 Cai J, Chen J, Liu Y, Miura T, Luo Y, Loring JF, Freed WJ, Rao MS & Zeng X (2006)  
338 Assessing self-renewal and differentiation in human embryonic stem cell lines.  
339 *Stem Cells* 24, 516–30.
- 340 Chang Y, Li H & Guo Z (2014) Mesenchymal stem cell-like properties in fibroblasts.  
341 *Cell. Physiol. Biochem.* 34, 703–714.
- 342 Christiansen L, Lenart A, Tan Q, Vaupel JW, Aviv A, McGue M & Christensen K

- 343 (2016) DNA methylation age is associated with mortality in a longitudinal Danish  
344 twin study. *Aging Cell* 15, 149–154.
- 345 Chung KM, Kolling FW, Gajdosik MD, Burger S, Russell AC & Nelson CE (2014)  
346 Single cell analysis reveals the stochastic phase of reprogramming to  
347 pluripotency is an ordered probabilistic process. *PLoS One* 9.
- 348 Faragher RGA (2015) Should we treat aging as a disease? The consequences and  
349 dangers of miscategorisation. *Front. Genet.* 6, 1–7.
- 350 Galan A, Diaz-Gimeno P, Poo ME, Valbuena D, Sanchez E, Ruiz V, Dopazo J,  
351 Montaner D, Conesa A & Simon C (2013) Defining the Genomic Signature of  
352 Totipotency and Pluripotency during Early Human Development. *PLoS One* 8,  
353 20–23.
- 354 Garagnani P, Bacalini MG, Pirazzini C, Gori D, Giuliani C, Mari D, Di AM, Gentilini D,  
355 Vitale G, Rezzi S, Castellani G, Capri M, Salvioli S & Franceschi C (2012)  
356 Methylation of ELOVL2 gene as a new epigenetic marker of age *Aging Cell*.  
357 *Aging Cell* 11, 1132–1134.
- 358 Genolini C, Alacoque X & Marianne Sentenac CA (2015) kml and kml3d: R  
359 Packages to Cluster Longitudinal Data. *J. Stat. Softw.* 65, 1–34. Available at:  
360 <http://www.jstatsoft.org/v65/i04/>.
- 361 Ginis I, Luo Y, Miura T, Thies S, Brandenberger R, Gerecht-Nir S, Amit M, Hoke A,  
362 Carpenter MK, Itskovitz-Eldor J & Rao MS (2004) Differences between human  
363 and mouse embryonic stem cells. *Dev. Biol.* 269, 360–380.
- 364 Gladyshev T V. & Gladyshev VN (2016) A Disease or Not a Disease? Aging As a  
365 Pathology. *Trends Mol. Med.* 22, 995–996.
- 366 Goodpaster T, Legesse-Miller A, Hameed MR, Aisner SC, Randolph-Habecker J &  
367 Coller HA (2008) An Immunohistochemical Method for Identifying Fibroblasts in  
368 Formalin-fixed, Paraffin-embedded Tissue. *J. Histochem. Cytochem.* 56, 347–  
369 358.
- 370 Hannum G, Guinney J, Zhao L, Zhang L, Hughes G, Sada S, Klotzle B, Bibikova M,  
371 Fan J, Gao Y, Deconde R, Chen M, Rajapakse I & Friend S (2013) Genome-  
372 wide Methylation Profiles Reveal Quantitative Views of Human Aging Rates.  
373 *Mol. Cell* 49, 359–367.
- 374 Horvath S (2013) DNA methylation age of human tissues and cell types. *Genome*  
375 *Biol.* 14, R115.
- 376 Horvath S, Garagnani P, Bacalini MG, Pirazzini C, Salvioli S, Gentilini D, Di Blasio  
377 AM, Giuliani C, Tung S, Vinters H V. & Franceschi C (2015) Accelerated  
378 epigenetic aging in Down syndrome. *Aging Cell* 14, 491–495.
- 379 Horvath S, Oshima J, Martin GM, Lu AT, Quach A, Cohen H, Felton S, Matsuyama  
380 M, Lowe D, Kabacik S, Wilson JG, Reiner AP, Maierhofer A, Flunkert J, Aviv A,  
381 Hou L, Baccarelli AA, Li Y, Stewart JD, Whitsel EA, Ferrucci L, Matsuyama S &  
382 Raj K (2018) Epigenetic clock for skin and blood cells applied to Hutchinson  
383 Gilford Progeria Syndrome and ex vivo studies. *Aging (Albany, NY)*. 10, 1758–  
384 1775.
- 385 Janmaat CJ, De Rooij KE, Locher H, De Groot SC, De Groot JCMJ, Frijns JHM &

- 386 Huisman MA (2015) Human dermal fibroblasts demonstrate positive  
387 immunostaining for neuron- and glia-specific proteins. *PLoS One* 10, 1–14.
- 388 Jylhävä J, Pedersen NL & Hägg S (2017) Biological Age Predictors. *EBioMedicine*  
389 21, 29–36.
- 390 Kalluri R & Zeisberg M (2006) Fibroblasts in cancer. *Nat. Rev. Cancer* 6, 392–401.
- 391 Kuznetsova A, Brockhoff PB & Bojesen Christensen RH (2016) lmerTest: Tests in  
392 Linear Mixed Effects Models. R package version 2.0-33. Available at:  
393 <https://cran.r-project.org/web/packages/lmerTest/index.html>.
- 394 Levine ME, Lu AT, Chen BH, Hernandez DG, Singleton AB, Ferrucci L, Bandinelli S,  
395 Salfati E, Manson JE, Quach A, Kusters CDJ, Kuh D, Wong A, Teschendorff  
396 AE, Widschwendter M, Ritz BR, Absher D, Assimes TL & Horvath S (2016)  
397 Menopause accelerates biological aging. *Proc. Natl. Acad. Sci.* 113, 9327–9332.
- 398 Levine ME, Lu AT, Quach A, Chen BH, Assimes TL, Hou L, Baccarelli AA, Stewart  
399 JD, Li Y, Whitsel EA, Wilson G, Reiner AP, Aviv A, Lohman K, Liu Y & Ferrucci  
400 L (2018) An epigenetic biomarker of aging for lifespan and healthspan. 10, 573–  
401 591.
- 402 Lowe D, Horvath S & Raj K (2016) Epigenetic clock analyses of cellular senescence  
403 and ageing. *Oncotarget* 7, 8524–31.
- 404 MacFadyen JR, Haworth O, Roberston D, Hardie D, Webster MT, Morris HR, Panico  
405 M, Sutton-Smith M, Dell A, Van Der Geer P, Wienke D, Buckley CD & Isacke  
406 CM (2005) Endosialin (TEM1, CD248) is a marker of stromal fibroblasts and is  
407 not selectively expressed on tumour endothelium. *FEBS Lett.* 579, 2569–2575.
- 408 Maierhofer A, Flunkert J, Oshima J, Martin GM, Haaf T & Horvath S (2017)  
409 Accelerated epigenetic aging in Werner syndrome. *Aging (Albany. NY)*. 9,  
410 1143–1152.
- 411 Mallon BS, Chenoweth JG, Johnson KR, Hamilton RS, Tesar PJ, Yavatkar AS,  
412 Tyson LJ, Park K, Chen KG, Fann YC & McKay RDG (2013) StemCellDB: The  
413 Human Pluripotent Stem Cell Database at the National Institutes of Health.  
414 *Stem Cell Res.* 10, 57–66.
- 415 Manukyan M & Singh PB (2012) Epigenetic rejuvenation. *Genes to Cells* 17, 337–  
416 343.
- 417 Manukyan M & Singh PB (2014) Epigenome rejuvenation: HP1 $\beta$  mobility as a  
418 measure of pluripotent and senescent chromatin ground states. *Sci. Rep.* 4, 1–  
419 8.
- 420 Marioni RE, Harris SE, Shah S, McRae AF, von Zglinicki T, Martin-Ruiz C, Wray NR,  
421 Visscher PM & Deary IJ (2016) The epigenetic clock and telomere length are  
422 independently associated with chronological age and mortality. *Int. J. Epidemiol.*  
423 45, 424–432.
- 424 Marioni RE, Shah S, McRae AF, Chen BH, Colicino E, Harris SE, Gibson J, Henders  
425 AK, Redmond P, Cox SR, Pattie A, Corley J, Murphy L, Martin NG, Montgomery  
426 GW, Feinberg AP, Fallin M, Multhaup ML, Jaffe AE, Joehanes R, Schwartz J,  
427 Just AC, Lunetta KL, Murabito JM, Starr JM, Horvath S, Baccarelli AA, Levy D,  
428 Visscher PM, Wray NR & Deary IJ (2015) DNA methylation age of blood

- 429 predicts all-cause mortality in later life. *Genome Biol.* 16, 25.
- 430 Ocampo A, Reddy P, Martinez-Redondo P, Platero-Luengo A, Hatanaka F, Hishida  
431 T, Li M, Lam D, Kurita M, Beyret E, Araoka T, Vazquez-Ferrer E, Donoso D,  
432 Roman JL, Xu J, Rodriguez Esteban C, Nuñez G, Nuñez Delicado E, Campistol  
433 JM, Guillen I, Guillen P & Izpisua Belmonte JC (2016) In Vivo Amelioration of  
434 Age-Associated Hallmarks by Partial Reprogramming. *Cell* 167, 1719–  
435 1733.e12.
- 436 Ohnishi K, Semi K, Yamamoto T, Shimizu M, Tanaka A, Mitsunaga K, Okita K,  
437 Osafune K, Arioka Y, Maeda T, Soejima H, Moriwaki H, Yamanaka S, Woltjen K  
438 & Yamada Y (2014) Premature termination of reprogramming in vivo leads to  
439 cancer development through altered epigenetic regulation. *Cell* 156, 663–677.
- 440 Ohnuki M, Tanabe K, Sutou K, Teramoto I, Sawamura Y, Narita M, Nakamura M,  
441 Tokunaga Y, Nakamura M, Watanabe A, Yamanaka S & Takahashi K (2014)  
442 Dynamic regulation of human endogenous retroviruses mediates factor-induced  
443 reprogramming and differentiation potential. *Proc. Natl. Acad. Sci.* 111, 12426–  
444 12431.
- 445 Perna L, Zhang Y, Mons U, Holleczek B, Saum K-U & Brenner H (2016) Epigenetic  
446 age acceleration predicts cancer, cardiovascular, and all-cause mortality in a  
447 German case cohort. *Clin. Epigenetics* 8, 64.
- 448 Pilling D, Fan T, Huang D, Kaul B & Gomer RH (2009) Identification of markers that  
449 distinguish monocyte-derived fibrocytes from monocytes, macrophages, and  
450 fibroblasts. *PLoS One* 4, 31–33.
- 451 Singh PB & Zacouto F (2010) Nuclear reprogramming and epigenetic rejuvenation.  
452 *J. Biosci.* 35, 315–319.
- 453 Singh VK, Kalsan M, Kumar N, Saini A & Chandra R (2015) Induced pluripotent stem  
454 cells: applications in regenerative medicine, disease modeling, and drug  
455 discovery. *Front. Cell Dev. Biol.* 3, 1–18.
- 456 Smith ZD, Sindhu C & Meissner A (2016) Molecular features of cellular  
457 reprogramming and development. *Nat. Rev. Mol. Cell Biol.* 17, 139–154.
- 458 Soria-Valles C, Osorio FG, Gutiérrez-Fernández A, De Los Angeles A, Bueno C,  
459 Menéndez P, Martín-Subero JI, Daley GQ, Freije JMP & López-Otín C (2015)  
460 NF- $\kappa$ B activation impairs somatic cell reprogramming in ageing. *Nat. Cell Biol.*  
461 17, 1004–13.
- 462 Stadtfeld M, Maherali N, Breault DT & Hochedlinger K (2008) Defining Molecular  
463 Cornerstones during Fibroblast to iPS Cell Reprogramming in Mouse. *Cell Stem*  
464 *Cell* 2, 230–240.
- 465 Takahashi K, Tanabe K, Ohnuki M, Narita M, Ichisaka T, Tomoda K & Yamanaka S  
466 (2007) Induction of Pluripotent Stem Cells from Adult Human Fibroblasts by  
467 Defined Factors. *Cell* 131, 861–872.
- 468 Takahashi K & Yamanaka S (2016) A decade of transcription factor-mediated  
469 reprogramming to pluripotency. *Nat. Rev. Mol. Cell Biol.* 17, 183–193.
- 470 Tanabe K, Nakamura M, Narita M, Takahashi K & Yamanaka S (2013) Maturation,  
471 not initiation, is the major roadblock during reprogramming toward pluripotency

- 472 from human fibroblasts. *Proc. Natl. Acad. Sci.* 110, 12172–12179.
- 473 Wagner W (2017) Epigenetic aging clocks in mice and men. *Genome Biol.* 18, 107.
- 474 Weidner C, Lin Q, Koch C, Eisele L, Beier F, Ziegler P, Bauerschlag D, Jöckel K-H,  
475 Erbel R, Mühleisen T, Zenke M, Brümmendorf T & Wagner W (2014) Aging of  
476 blood can be tracked by DNA methylation changes at just three CpG sites.  
477 *Genome Biol.* 15, R24.
- 478 Wernig M, Lengner CJ, Hanna J, Lodato MA, Steine E, Foreman R, Staerk J,  
479 Markoulaki S & Jaenisch R (2008) A drug-inducible transgenic system for direct  
480 reprogramming of multiple somatic cell types. *Nat. Biotechnol.* 26, 916–924.
- 481 Zhou L, Yang K, Randall Wickett R & Zhang Y (2016) Dermal fibroblasts induce cell  
482 cycle arrest and block epithelial–mesenchymal transition to inhibit the early  
483 stage melanoma development. *Cancer Med.* 5, 1566–1579.



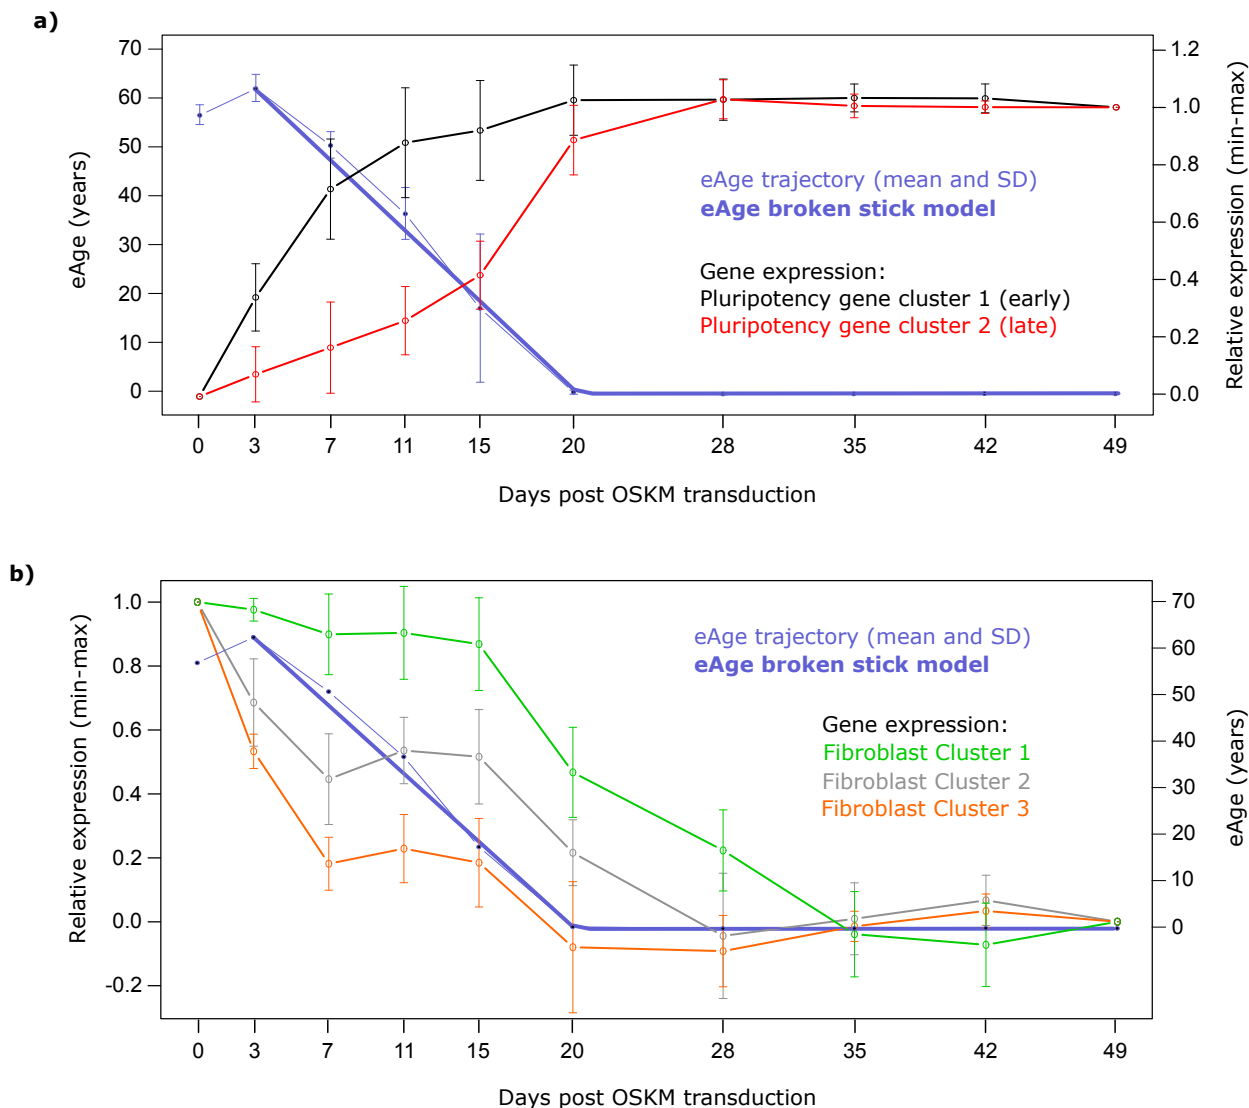

**Figure 1. Dynamics of eAge and gene expression in a 49-day HDF reprogramming time-course. (a) Left Y axis:** eAge trajectory of Horvath's multi-tissue age predictor calculated from DNA methylation arrays from the following cell populations: day 0 (HDFs), day 3 (OSKM-expressing EGFP (+) HDFs), day 7, 11, 15, 20 and 28 (human pluripotency marker TRA-1-60 (+) cells at intermediate stages of reprogramming), and fully reprogrammed iPSCs from days 35, 42 and 49. Data was fit with a broken stick model composed of two linear sections. Error bars represent SD. Measured rate (years per day) of eAge decrease [day 3 - day 20] = -3.8, SE 0.27,  $P = 3.8 \times 10^{-7}$ . **Right Y axis:** Composite gene expression trajectories of key pluripotency markers, statistically clustered as per Genolini et al. 2016. Microarray expression data was obtained for the same time points and cell populations as for eAge. Relative expression values were LOG2 transformed and presented as arbitrary units starting from '0' for 'day 0' to '1' for 'day 49'. Error bars represent SD. **(b) Left Y axis:** Composite gene expression trajectories of key fibroblast markers statistically clustered as described for the pluripotency markers in (a). Relative expression values are presented as arbitrary units starting from '1' for 'day 0' to '0' for 'day 49'. **Right Y axis:** eAge as in (a) left Y axis, without SD.

**Table 1. List of pluripotency and fibroblast marker genes used in gene expression clusters.** Key pluripotent marker genes were selected from Ginis et al. 2004; Cai et al. 2006; Mallon et al. 2013; Galan et al. 2013; Boyer et al. 2005. Fibroblast marker genes were selected from Kalluri & Zeisberg 2006; Zhou et al. 2016; Janmaat et al. 2015; Pilling et al. 2009; Chang et al. 2014; Goodpaster et al. 2008; MacFadyen et al. 2005.

| Marker       | Gene                       | Protein name                                           | Accession     | Cluster   |
|--------------|----------------------------|--------------------------------------------------------|---------------|-----------|
| Pluripotency | <i>NANOG</i>               | Nanog homeobox                                         | A_23_P204640  | 1 (early) |
| Pluripotency | <i>REX1 (ZFP42)</i>        | Zinc Finger Protein 42                                 | A_23_P395582  | 1 (early) |
| Pluripotency | <i>TRA-1-60/81 (PODXL)</i> | Podocalyxin                                            | A_23_P215060  | 1 (early) |
| Pluripotency | <i>UTF1</i>                | Undifferentiated embryonic cell transcription factor 1 | A_33_P3294217 | 1 (early) |
| Pluripotency | <i>DPPA4</i>               | Developmental pluripotency associated 4                | A_23_P380526  | 1 (early) |
| Pluripotency | <i>TDGF1 (CRIPTO)</i>      | Teratocarcinoma-derived growth factor 1                | A_23_P366376  | 1 (early) |
| Pluripotency | <i>SALL4</i>               | Spalt like transcription factor 4                      | A_23_P109072  | 1 (early) |
| Pluripotency | <i>LEFTY1</i>              | Left-right determination factor 1                      | A_23_P160336  | 1 (early) |
| Pluripotency | <i>LEFTY2</i>              | Left-right determination factor 2                      | A_23_P137573  | 1 (early) |
| Pluripotency | <i>DNMT3A</i>              | DNA methyl-transferase 3A                              | A_23_P154500  | 1 (early) |
| Pluripotency | <i>TFCP2L1</i>             | Transcription factor CP2 like 1                        | A_23_P5301    | 1 (early) |
| Pluripotency | <i>TERF1</i>               | Telomeric repeat binding factor (NIMA-interacting) 1   | A_23_P216149  | 2 (late)  |
| Pluripotency | <i>DPPA5</i>               | Developmental pluripotency associated 5                | A_32_P233950  | 2 (late)  |
| Pluripotency | <i>TERT</i>                | Telomerase reverse transcriptase                       | A_23_P110851  | 2 (late)  |
| Pluripotency | <i>ZIC3</i>                | Zic family member 3                                    | A_23_P327910  | 2 (late)  |
| Pluripotency | <i>LIN28a</i>              | LIN28 homolog A                                        | A_23_P74895   | 2 (late)  |
| Pluripotency | <i>LIN28b</i>              | LIN28 homolog B                                        | A_33_P3220615 | 2 (late)  |
| Pluripotency | <i>LECT1</i>               | Leukocyte cell derived chemotaxin 1                    | A_23_P25587   | 2 (late)  |
| Pluripotency | <i>DNMT3B</i>              | DNA methyl-transferase 3B                              | A_23_P28953   | 2 (late)  |
| Fibroblast   | <i>COL3A1</i>              | Pro-collagen $\alpha$ 2(III)                           | A_24_P935491  | 1         |
| Fibroblast   | <i>FSP-1</i>               | Fibroblast surface protein                             | A_23_P94800   | 1         |
| Fibroblast   | <i>TGFB3</i>               | Transforming growth factor beta 3                      | A_23_P88404   | 1         |
| Fibroblast   | <i>TGFB2</i>               | Transforming growth factor beta 2                      | A_24_P402438  | 1         |
| Fibroblast   | <i>COL1A2</i>              | Pro-collagen $\alpha$ 2(I)                             | A_24_P277934  | 2         |
| Fibroblast   | <i>ITGA1</i>               | Integrin $\alpha$ 1b1 (VLA-1)                          | A_33_P3353791 | 2         |
| Fibroblast   | <i>DDR2</i>                | Discoidin-domain-receptor-2                            | A_23_P452     | 2         |
| Fibroblast   | <i>P4HA3</i>               | Prolyl 4-hydroxylase                                   | A_24_P290286  | 2         |
| Fibroblast   | <i>THY1</i>                | Thy-1 cell surface antigen; CD90                       | A_33_P3280845 | 2         |
| Fibroblast   | <i>FAP</i>                 | Fibroblast activation protein                          | A_23_P56746   | 2         |
| Fibroblast   | <i>CD248</i>               | Endosialin, TEM1                                       | A_33_P3337485 | 2         |
| Fibroblast   | <i>VIM</i>                 | Vimentin                                               | A_23_P161190  | 2         |
| Fibroblast   | <i>COL1A1</i>              | Pro-collagen $\alpha$ 1(I)                             | A_33_P3304668 | 3         |
| Fibroblast   | <i>ITGA5</i>               | Integrin $\alpha$ 5b1                                  | A_23_P36562   | 3         |
| Fibroblast   | <i>P4HA1</i>               | Prolyl 4-hydroxylase                                   | A_33_P3214481 | 3         |
| Fibroblast   | <i>P4HA2</i>               | Prolyl 4-hydroxylase                                   | A_33_P3394933 | 3         |
| Fibroblast   | <i>TGFB1</i>               | Transforming growth factor beta 1                      | A_24_P79054   | 3         |
| Fibroblast   | <i>HSP47</i>               | Serpin family H member 1, SERPINH1                     | A_33_P3269203 | -         |
| Fibroblast   | <i>CD34</i>                | Hematopoietic progenitor cell antigen                  | A_23_P23829   | -         |
